# Supplementary material for: A turn-on fluorescent Zn(ii) metal–organic framework sensor for quantitative anthrax biomarker detection
Source: Royal Society of Chemistry journal article supplement (doi:10.1039/d3dt00619k), 2023-01-01
Supplement: d3dt00619k1.pdf [file d3dt00619k1.pdf]

# Electronic Supplementary Information

## **A turn-on fluorescent Zn(II) metal–organic framework sensor for quantitative anthrax biomarker detection**

*Chao Hong<sup>a,b</sup>, Ling Li<sup>\*a</sup>, Ji-Yong Zou<sup>\*a</sup>, Li Zhang<sup>a</sup>, Sheng-Yong You<sup>a</sup>*

<sup>a</sup>Institute of Applied Chemistry, Jiangxi Academy of Sciences, Nanchang 330096, PR China

<sup>b</sup>School of Materials Science and Engineering, Nanchang Hangkong University, Nanchang, 330063, PR China

Table S1 Crystal data and Structure Refinements for **1**.

| Compound                                                                                                       | <b>1</b>                          |
|----------------------------------------------------------------------------------------------------------------|-----------------------------------|
| Formula                                                                                                        | $C_{63.6}H_{41.4}N_3O_{16.2}Zn_3$ |
| formula weight                                                                                                 | 1302.90                           |
| temperature (K)                                                                                                | 100.00(10)                        |
| crystal system                                                                                                 | triclinic                         |
| space group                                                                                                    | <i>P</i> -1                       |
| <i>a</i> (Å)                                                                                                   | 13.1143(3) Å                      |
| <i>b</i> (Å)                                                                                                   | 13.1651(3)                        |
| <i>c</i> (Å)                                                                                                   | 16.3159(4)                        |
| $\alpha$ (°)                                                                                                   | 97.934(2) °                       |
| $\beta$ (°)                                                                                                    | 95.154(2) °                       |
| $\gamma$ (°)                                                                                                   | 92.056(2) °                       |
| <i>V</i> (Å <sup>3</sup> )                                                                                     | 2775.38(11)                       |
| <i>Z</i>                                                                                                       | 2                                 |
| <i>D<sub>c</sub></i> (g cm <sup>-3</sup> )                                                                     | 1.559                             |
| $\mu$ (mm <sup>-1</sup> )                                                                                      | 1.364                             |
| <i>F</i> (000)                                                                                                 | 1327.0                            |
| 2 $\theta$ range (°)                                                                                           | 3.122 to 58.936 °                 |
| GOF on <i>F</i> <sup>2</sup>                                                                                   | 1.068                             |
| reflections collected / unique                                                                                 | 34375 / 12411                     |
| <i>R</i> <sub>int</sub>                                                                                        | 0.0284                            |
| <i>R</i> <sub>1</sub> , <sup>a</sup> <i>wR</i> <sub>2</sub> <sup>b</sup> [ <i>I</i> > 2 $\sigma$ ( <i>I</i> )] | 0.0493, 0.1378                    |
| <i>R</i> <sub>1</sub> , <i>wR</i> <sub>2</sub> ( all data)                                                     | 0.0706, 0.1497                    |

$$R_1^a = \sum(|F_o| - |F_c|) / \sum|F_o|, {}^b wR_2 = [\sum\{w(|F_o|^2 - |F_c|^2)^2\} / \sum[w(|F_o|^2)^2]]^{1/2}$$

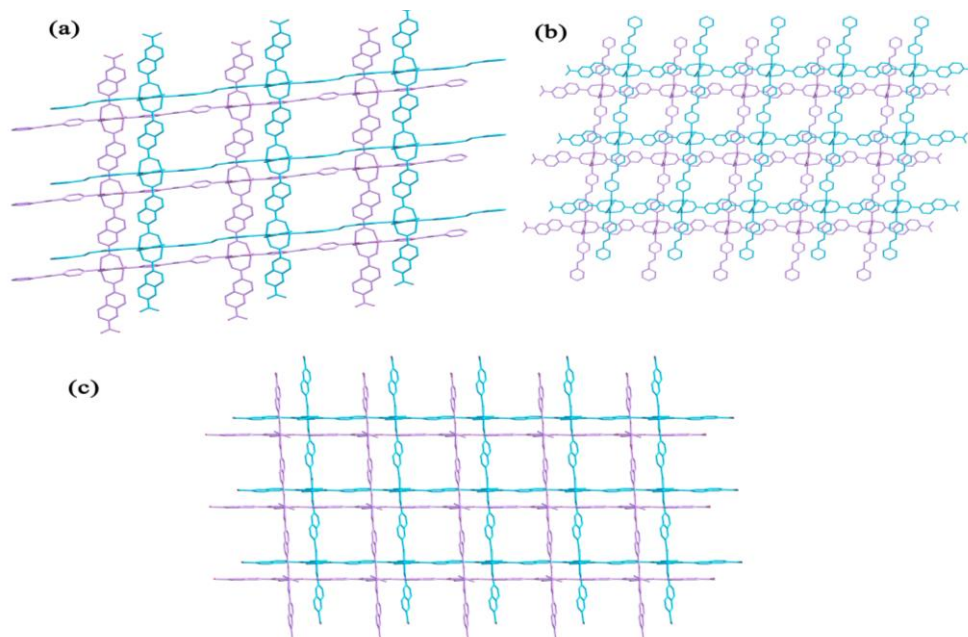

**Figure S1** The 3D framework exhibits along the a, b and c directions

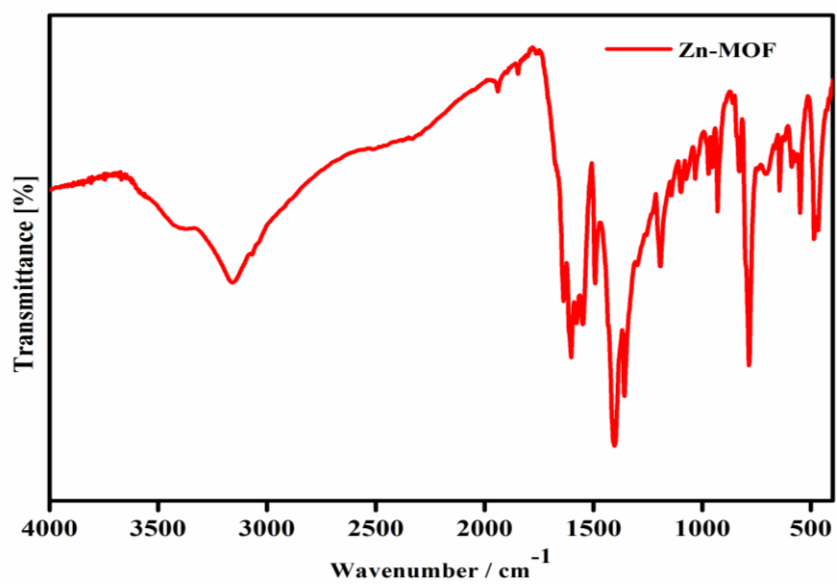

**Figure S2** Infrared spectra of **1**.

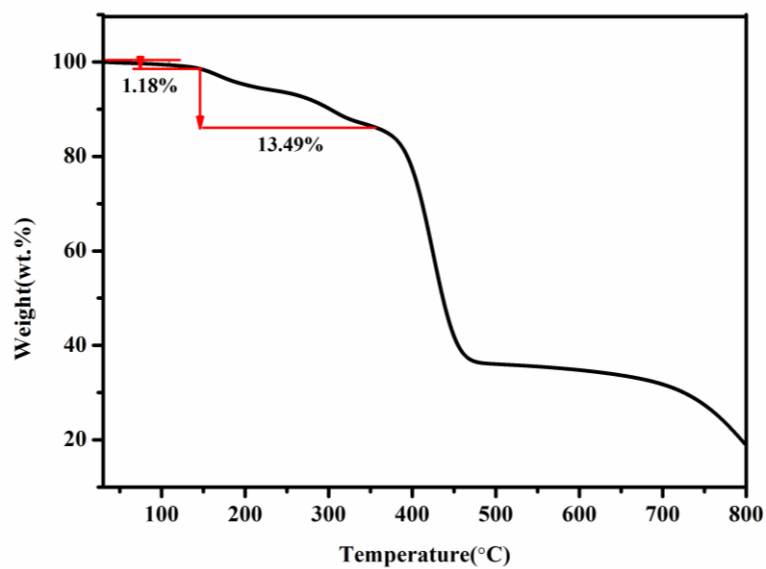

**Figure S3** The thermal gravimetric curves (TGA) of **1**.

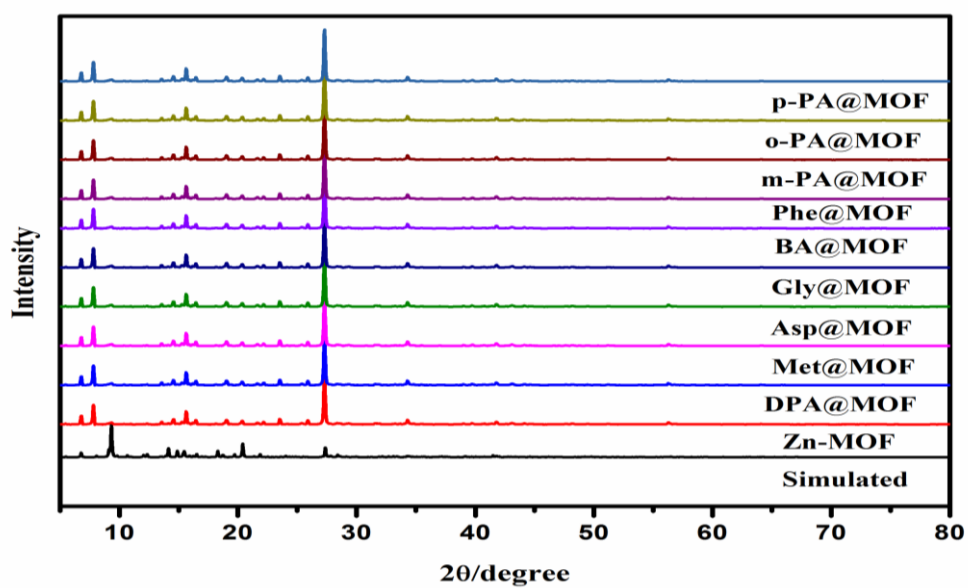

**Figure S4** The pxrd contrast diagram of add various interferers and **1**

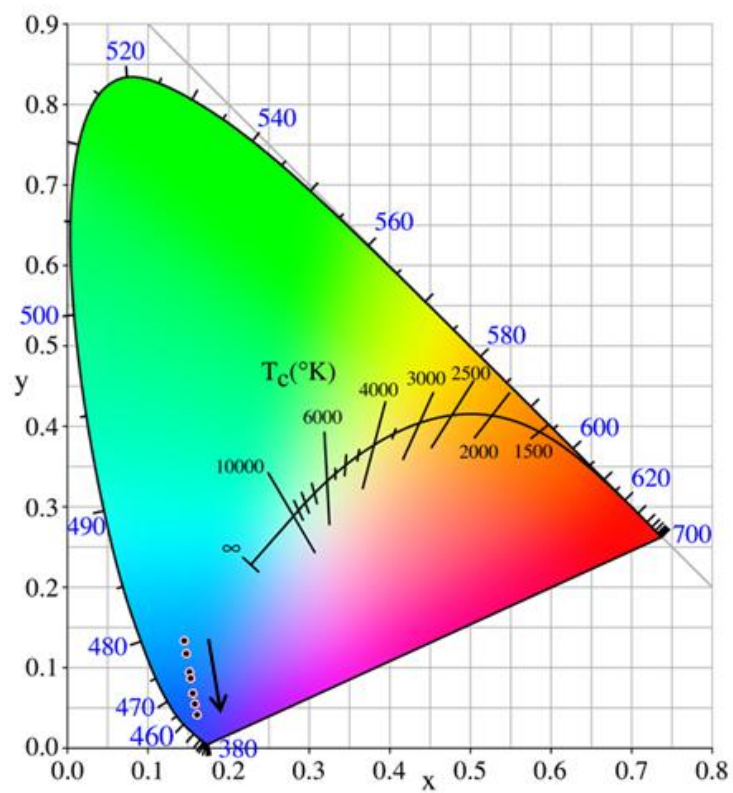

**Figure S5** CIE chromaticity diagram showing the color coordinates of **1** and **1** containing DPA.

**Table S2.** Performance comparison of several sensors for the detection of anthrax biomark DPA.

| Sensor                                     | Detection mechanism              | Detection limit | Reference                                        |
|--------------------------------------------|----------------------------------|-----------------|--------------------------------------------------|
| <b>1</b>                                   | <b>turn-on</b>                   | <b>128nM</b>    | <b>The present work</b>                          |
| Tb-COP                                     | turn-on                          | 13.5 nM         | Sens. Actuators, B., 2019, 290, 9                |
| PV-Tb <sup>3+</sup>                        | dual colorimetric turn-on        | 5 μM            | Analyst., 2013, 138, 7079                        |
| R <sub>6</sub> H@Eu(BTC)                   | dual colorimetric turn-on        | 4.5 μM          | Sens. Actuators, B., 2018, 266, 263              |
| AgNPs–Eu <sup>3+</sup>                     | dual colorimetric turn-on        | 0.31 μM         | ACS Appl. Nano Mater. 2021, 4, 5469–5477         |
| Eu <sup>3+</sup> –EBT                      | dual colorimetric turn-on        | 2 μM            | Anal. Chem. 2018, 90, 4221–4225                  |
| BCNO QDs-EDTA-Eu <sup>3+</sup>             | Ratiometric fluorescence turn-on | 0.5 nM          | ACS Appl. Mater. Interfaces 2019, 11, 2336–2343. |
| TPP/EBT–UCNPs                              | dual colorimetric turn-on        | 0.9 μM          | Anal. Chem. 2019, 91, 18, 12094–12099            |
| R <sub>6</sub> G/Eu-CdS@ZIF-8              | Ratiometric Fluorescence turn-on | 67 nM           | Anal. Chem. 2020, 92, 7114–7122.                 |
| Tb <sup>3+</sup> @NH <sub>2</sub> - HPU-17 | Ratiometric Fluorescence turn-on | 44.6 nM         | Inorg. Chem. 2021, 60, 2590–2597                 |
| Tb-H <sub>2</sub> DHBDC                    | turn-on                          | 2.4 μM          | Dalton Trans., 2021, 50, 1300                    |
| Eu <sup>3+</sup> –GMP–Tb <sup>3+</sup>     | dual colorimetric turn-on        | 96nM            | Anal. Chem. 2018, 90, 7004–7011                  |
| AuNPs@GSH                                  | dual colorimetric                | 2 μM            | Anal. Bioanal. Chem. 2018, 410, 1805-1815.       |
| CDs-Tb                                     | Ratiometric Fluorescence turn-on | 39.4 nM         | Nanomaterials 2019, 9, 1234;                     |
| Eu <sub>0.1</sub> Tb <sub>0.9</sub> -BDC   | Ratiometric Fluorescence turn-on | 2.277 μM        | J. Mater. Chem. C, 2020, 8, 4392                 |

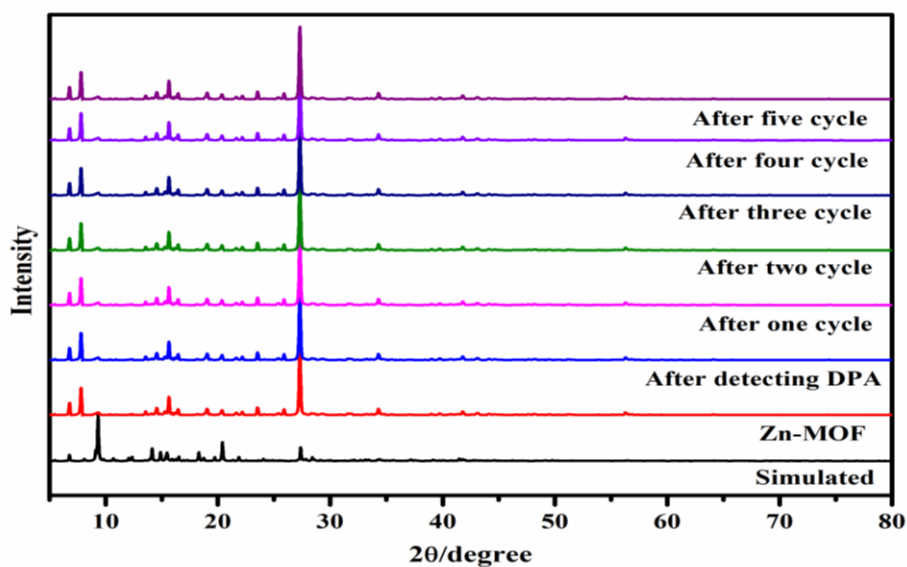

**Figure S6** The PXRD patterns of **1** for simulated, as-synthesized and after each recycling experiment of DPA detection

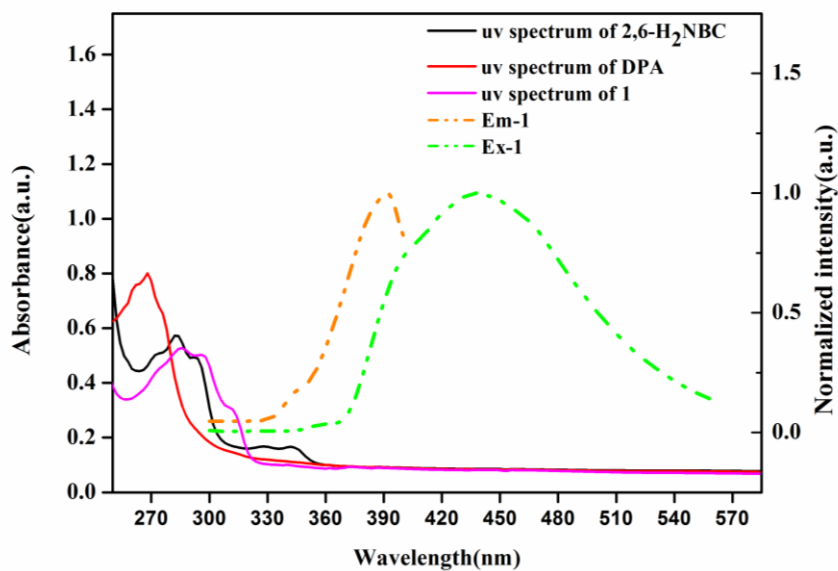

**Figure S7** The UV-Vis absorbance spectra of 2,6-H<sub>2</sub>NBC ligand, DPA, and **1** and the excitation and emission spectra of **1**

The fluorescence lifetimes of **1** were determined using the following equation based on a bi-exponential fit of the PL decay plots.

$$R(t)=B_1e^{(-t/\tau_1)}+ B_2e^{(-t/\tau_2)}$$

Table S3. Double exponential fitting parameters of PL attenuation graphs doped with DPA of different concentrations

| The DPA | $\tau_1$ (ns) | Std. dev.(ns) | $\tau_2$ (ns) | Std. dev.(ns) | $X_2$  |
|---------|---------------|---------------|---------------|---------------|--------|
| 0.00mM  | 4.6148        | 0.1104        | 13.1015       | 0.2192        | 1.0483 |
| 0.32mM  | 0.7654        | 0.0123        | 3.4624        | 0.0535        | 0.8191 |
| 1.32mM  | 0.8133        | 0.0139        | 3.5918        | 0.0517        | 0.8530 |
